# Supplementary material for: Snapshot of Anti-SARS-CoV-2 IgG Antibodies in COVID-19 Recovered Patients in Guinea
Source: MDPI journal article supplement (doi:10.3390/jcm13102965), 2024-05-17
Supplement: s1 [file s1]

## Supplementary Materials

**Table S1.** Age by sex of the participants.

|        | Mean [IC <sub>95</sub> ] | Min–Max | Median [IC <sub>95</sub> ] | KW   | P-value  |
|--------|--------------------------|---------|----------------------------|------|----------|
| Female | 34.22 [34.78-40.65]      | 9-68    | 33 [30.06-35.93]           | 8.14 | 0.004*** |
| Male   | 39.9 [34.77-40.65]       | 2-80    | 40 [37.0-42.93]            |      |          |
| Total  | 37.59 [35.56-39.86]      | 2-80    | 35 [32.85-37.15]           |      |          |

**Table S2.** Seroreactivity by sex, age, and PI period.

| Variable  | Class    | Median | KW value | P-value  |
|-----------|----------|--------|----------|----------|
| Sex       | Female   | 0.49   | 3.2      | 0.073    |
|           | Male     | 0.62   |          |          |
| Age group | (0-20]   | 0.47   | 15.73    | 0.001*** |
|           | (20-35]  | 0.48   |          |          |
|           | (35-60]  | 0.68   |          |          |
|           | (60-100] | 0.87   |          |          |
| PI period | (0-3]    | 1.040  | 11.49    | 0.022*   |
|           | (3-6]    | 0.580  |          |          |
|           | (6-9]    | 0.550  |          |          |
|           | (9-12]   | 0.515  |          |          |
|           | (12-18]  | 0.535  |          |          |

Kruskal–Wallis (KW).
